# Supplementary material for: PHISDetector: A Tool to Detect Diverse In Silico Phage–host Interaction Signals for Virome Studies
Source: PubMed Central journal article supplement — Genomics Proteomics Bioinformatics. 2022 Mar 8;20(3):508–23. doi: 10.1016/j.gpb.2022.02.003 (PMC9801046; doi:10.1016/j.gpb.2022.02.003), 2022-03-08

**A** Top 20 phage genera in training set

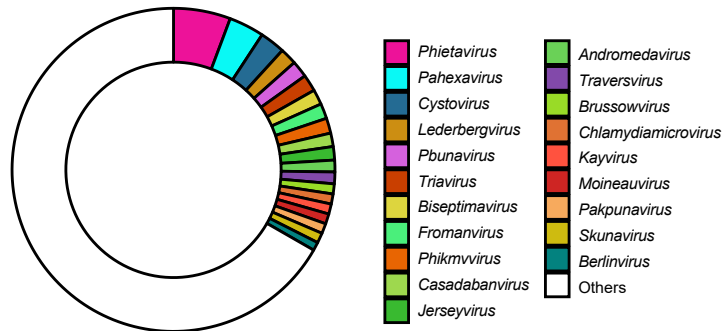

Top 20 phage genera in test set

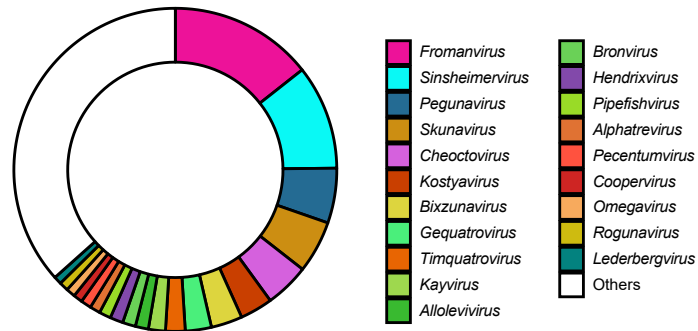

**B** Top 20 host species in training set

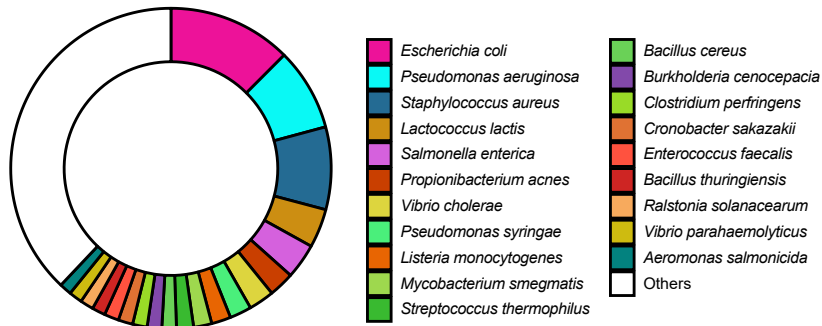

Top 20 host species in test set

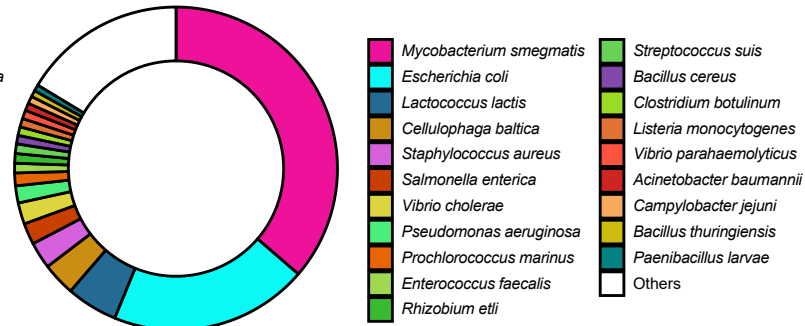

Supplement: mmc1.pdf [file mmc1.pdf]
