# Supplementary figures and images for: PHISDetector: A Tool to Detect Diverse In Silico Phage–host Interaction Signals for Virome Studies
Source: PubMed Central journal article supplement — Genomics Proteomics Bioinformatics. 2022 Mar 8;20(3):508–23. doi: 10.1016/j.gpb.2022.02.003 (PMC9801046; doi:10.1016/j.gpb.2022.02.003), 2022-03-08

## Receiver operating characteristics of RF model

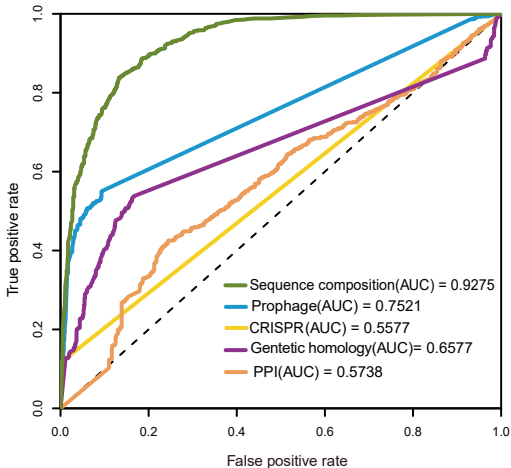

Supplement: mmc2.pdf [file mmc2.pdf]

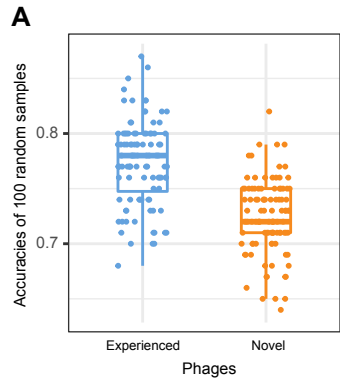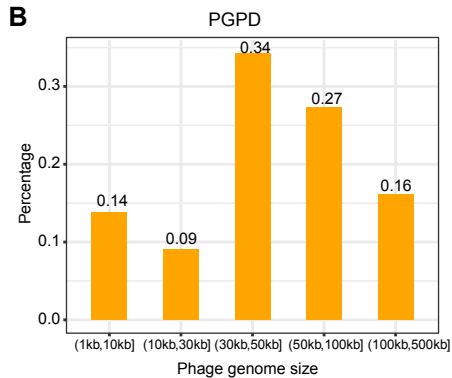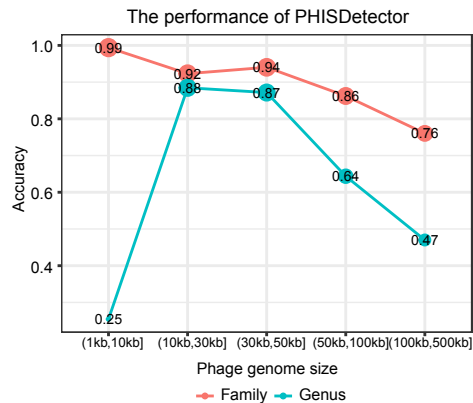

Supplement: mmc3.pdf [file mmc3.pdf]

# ROC curves of PHISDetector and RaFAH for mVCs

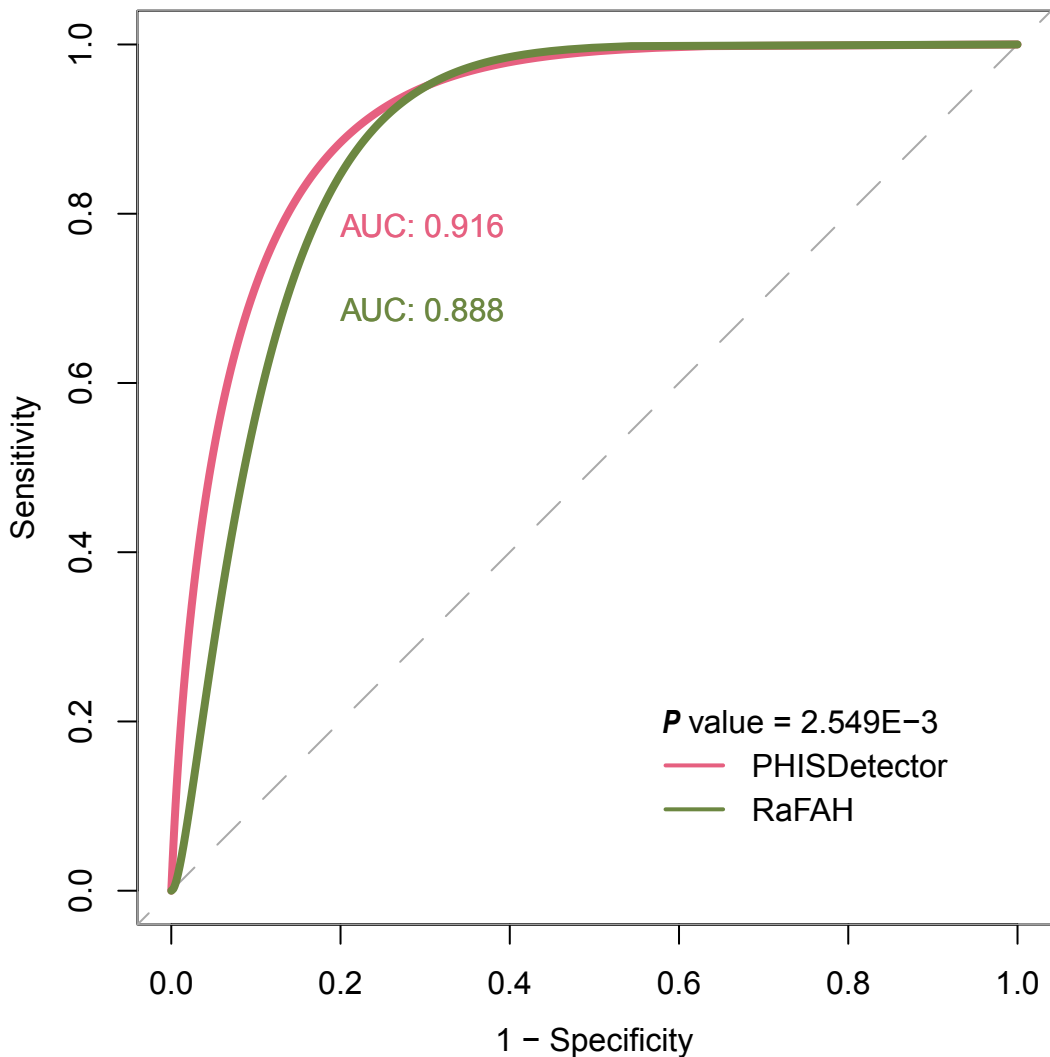

Supplement: mmc4.pdf [file mmc4.pdf]
